# Supplementary material for: Fructose intake and risk of gout and hyperuricemia: a systematic review and meta-analysis of prospective cohort studies
Source: PubMed Central journal article supplement — BMJ Open. 2016 Oct 3;6(10):e013191. doi: 10.1136/bmjopen-2016-013191 (PMC5073537; doi:10.1136/bmjopen-2016-013191), 2016-10-03
Supplement: bmjopen-2016-013191supp1.pdf [file bmjopen-2016-013191supp1.pdf]

## Supporting Information

**S1 Table.** Search Strategy for Studies Assessing Fructose Intake and Risk of Incident Gout and Hyperuricemia.

| Database (# of hits)                                       | Search Terms                                                                                                                                                                                                                                                                                                                                                            |
|------------------------------------------------------------|-------------------------------------------------------------------------------------------------------------------------------------------------------------------------------------------------------------------------------------------------------------------------------------------------------------------------------------------------------------------------|
| EMBASE (1,483)<br>&<br>MEDLINE (688)<br>&<br>Cochrane (19) | 1. fructose/<br>2. fructose*.mp.<br>3. sucrose/<br>4. sucrose*.mp.<br>5. sugar*<br>6. (honey or honeys).mp.<br>7. HFCS.mp.<br>8. 1 or 2 or 3 or 4 or 5 or 6 or 7<br>9. Gout/<br>10. (gout or gouty).mp.<br>11. hyperuricemia/<br>12. (hyperuricemia or<br>hyperuricaemia).mp.<br>13. uric acid/<br>14. uric*.mp.<br>15. 9 or 10 or 11 or 12 or 13 or 14<br>16. 8 and 15 |

For all databases, the original search date was October 5<sup>th</sup>, 2012; updated search was performed on: September 22nd, 2015.

**S2 table.** Newcastle-Ottawa Scale (NOS) for Assessing the Quality of Cohort Studies

| <b>Study</b>                  | <b>Selection<sup>1</sup></b> | <b>Outcome<sup>2</sup></b> | <b>Comparability<sup>3</sup></b> | <b>Total<sup>4</sup></b> |
|-------------------------------|------------------------------|----------------------------|----------------------------------|--------------------------|
| Choi et al, 2008 Males [38]   | 2                            | 2                          | 2                                | 6                        |
| Choi et al, 2010 Females [39] | 2                            | 2                          | 2                                | 6                        |

<sup>1</sup>Maximum 4 stars awarded for cohort representativeness, selection of non-exposed cohort, exposure assessment, and demonstration outcome not present at baseline

<sup>2</sup>Maximum 3 stars awarded for follow-up length, adequacy of follow-up, and outcome assessment

<sup>3</sup>Maximum 2 stars awarded for controlling for main confounders

<sup>4</sup>Studies receiving  $\geq 6$  points were considered high quality; a maximum of 9 points could be awarded

**S3 Table. GRADE Assessment.**

| Quality assessment                                                        |                                      |                                       |                      |                        |                         |                                     |                                                                                      |
|---------------------------------------------------------------------------|--------------------------------------|---------------------------------------|----------------------|------------------------|-------------------------|-------------------------------------|--------------------------------------------------------------------------------------|
| Participants (studies)<br>Follow up                                       | Risk of bias                         | Inconsistency                         | Indirectness         | Imprecision            | Publication bias        | Other considerations                | Overall Quality<br>(Very Low ⊕;<br>Low ⊕⊕;<br>Moderate ⊕⊕⊕; High ⊕⊕⊕⊕)               |
| <b>Total fructose intake on incident gout (follow-up median 17 years)</b> |                                      |                                       |                      |                        |                         |                                     |                                                                                      |
| 125,299<br>(2 studies)<br>17 years                                        | No serious risk of bias <sup>1</sup> | No serious inconsistency <sup>2</sup> | Serious <sup>3</sup> | No serious imprecision | Undetected <sup>5</sup> | Dose response gradient <sup>6</sup> | ⊕⊕<br><b>LOW</b> <sup>1,2,3,4,5</sup><br>due to indirectness, dose-response gradient |

<sup>1</sup> No serious risk of bias as both studies included had NOS=6.

<sup>2</sup> No evidence of significant inter-study heterogeneity ( $I^2=0\%$ ,  $p=0.33$ ).

<sup>3</sup> Serious indirectness as evidence is based on only 2 cohorts in predominantly white health professionals and may not be representative of different populations.

<sup>4</sup> Publication bias cannot be excluded since we were unable to test for funnel plot asymmetry due to lack of power (<10 studies).

<sup>5</sup> An approximate dose-response gradient was observed in both studies where most increasing quintiles of fructose consumption corresponded with an increased risk of gout.

**S1 Figure.** Fructose Intake and the Relative Risk of Gout in Multivariate Models Adjusted for Percentage of Energy from Non-Fructose Carbohydrates and Protein.

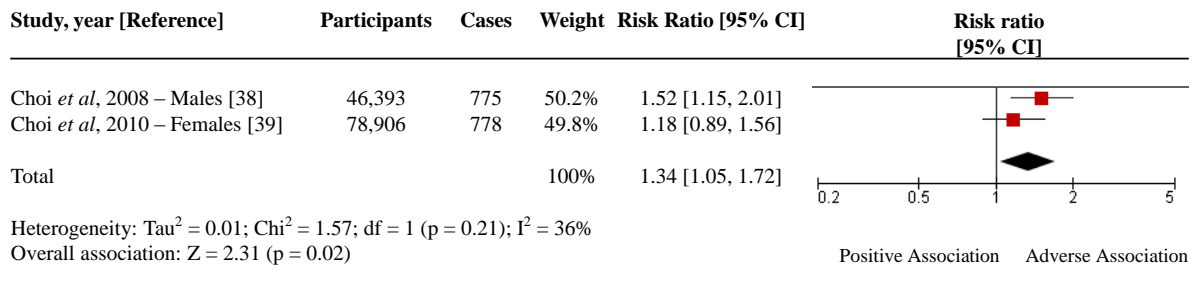

Forest plot of prospective cohort studies investigating the relationship between total fructose intake and incident gout. Estimates from most-adjusted multivariate models accounting for percentage of energy from non-fructose carbohydrates and protein were used. The diamond represents the pooled effect estimate. Inter-study heterogeneity was tested using Cochran’s Q and quantified using the  $I^2$  statistic ( $I^2 \geq 50\%$  indicative of significant heterogeneity). All results are presented as risk ratios (RR) with 95% confidence intervals.

**S2 Figure.** Fructose Intake and Risk of Gout in Least-Adjusted Models.

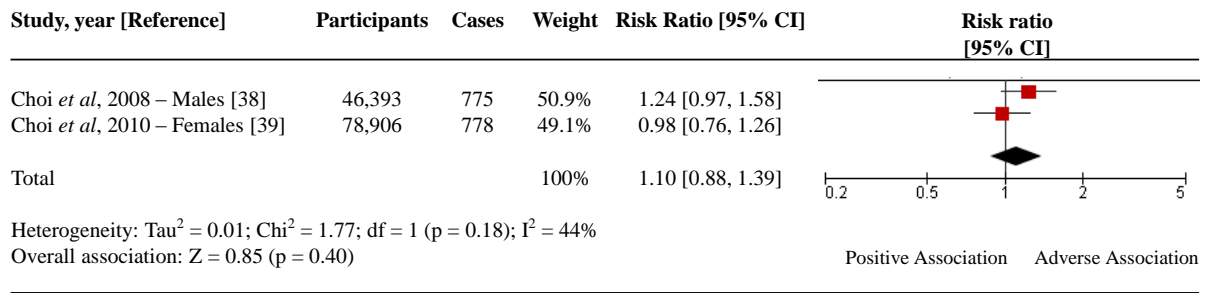

Forest plot of prospective cohort studies investigating the relationship between total fructose intake and incident gout. Estimates from least-adjusted models were used. The diamond represents the pooled effect estimate. Inter-study heterogeneity was tested using Cochran’s Q and quantified using the  $\text{I}^2$  statistic ( $\text{I}^2 \geq 50\%$  indicative of significant heterogeneity). All results are presented as risk ratios (RR) with 95% confidence intervals.
